# Supplementary material
Source: bioRxiv or medRxiv preprint supplement (https://medrxiv.org/highwire/filestream/79344/field_highwire_adjunct_files/0/2020.05.05.20080044-1.pdf)
Supplement: Supplementary file [file 2020.05.05.20080044-1.pdf]

## Supplemental Tables

Supplementary Table 1: Number of blood culture sets collected per patient with “not tested” SARS-CoV-2 status

|                       | Jan-Feb<br>2019<br>(N=29019) | Mar 1-15,<br>2019<br>(N=7601) | Mar 16-31,<br>2019<br>(N=7688) | Jan-Feb<br>2020<br>(N=28593) | Mar 1-15,<br>2020<br>(N=5942) | Mar 16-31,<br>2020<br>(N=1896) | Total<br>(N=80739) |
|-----------------------|------------------------------|-------------------------------|--------------------------------|------------------------------|-------------------------------|--------------------------------|--------------------|
| <b>BC per patient</b> |                              |                               |                                |                              |                               |                                |                    |
| 1                     | 1612<br>(5.6%)               | 378 (5.0%)                    | 433 (5.6%)                     | 1689<br>(5.9%)               | 349 (5.9%)                    | 166 (8.8%)                     | 4627<br>(5.7%)     |
| 2                     | 9253<br>(31.9%)              | 2302<br>(30.3%)               | 2334<br>(30.4%)                | 9438<br>(33.0%)              | 2016<br>(33.9%)               | 685 (36.1%)                    | 26028<br>(32.2%)   |
| 3-5                   | 5834<br>(20.1%)              | 1508<br>(19.8%)               | 1479<br>(19.2%)                | 6238<br>(21.8%)              | 1071<br>(18.0%)               | 363 (19.1%)                    | 16493<br>(20.4%)   |
| 6-10                  | 6010<br>(20.7%)              | 1638<br>(21.5%)               | 1598<br>(20.8%)                | 6023<br>(21.1%)              | 1309<br>(22.0%)               | 339 (17.9%)                    | 16917<br>(21.0%)   |
| 11-30                 | 5214<br>(18.0%)              | 1540<br>(20.3%)               | 1607<br>(20.9%)                | 4695<br>(16.4%)              | 1128<br>(19.0%)               | 331 (17.5%)                    | 14515<br>(18.0%)   |
| >30                   | 1096<br>(3.8%)               | 235 (3.1%)                    | 237 (3.1%)                     | 510 (1.8%)                   | 69 (1.2%)                     | 12 (0.6%)                      | 2159<br>(2.7%)     |

Supplementary Table 2: Number of BC sets collected per patient tested for SARS-CoV-2

|                       | Negative (N=2986) | Positive (N=4478) | Total (N=7464) | p value              |
|-----------------------|-------------------|-------------------|----------------|----------------------|
| <b>BC per patient</b> |                   |                   |                | < 0.001 <sup>1</sup> |
| 1                     | 114 (3.8%)        | 127 (2.8%)        | 241 (3.2%)     |                      |
| 2                     | 896 (30.0%)       | 2194 (49.0%)      | 3090 (41.4%)   |                      |
| 3-5                   | 687 (23.0%)       | 1189 (26.6%)      | 1876 (25.1%)   |                      |
| 6-10                  | 637 (21.3%)       | 829 (18.5%)       | 1466 (19.6%)   |                      |
| 11-30                 | 597 (20.0%)       | 139 (3.1%)        | 736 (9.9%)     |                      |
| >30                   | 55 (1.8%)         | 0 (0.0%)          | 55 (0.7%)      |                      |

1. Pearson's Chi-squared test

Supplementary Table 3: Microorganisms isolated per blood culture set by SARS-CoV-2 status

| Organism Name                                                  | Not tested<br>(N=6260) | Negative<br>(N=245) | Positive<br>(N=201) | Total<br>(N=6706) |
|----------------------------------------------------------------|------------------------|---------------------|---------------------|-------------------|
| <i>Abiotrophia defectiva</i>                                   | 3 (0.0%)               | 0 (0.0%)            | 0 (0.0%)            | 3 (0.0%)          |
| <i>Achromobacter xylosoxidans</i>                              | 6 (0.1%)               | 0 (0.0%)            | 0 (0.0%)            | 6 (0.1%)          |
| <i>Achromobacter xylosoxidans</i> subsp<br><i>xylosoxidans</i> | 1 (0.0%)               | 0 (0.0%)            | 0 (0.0%)            | 1 (0.0%)          |
| <i>Acinetobacter baumannii</i>                                 | 6 (0.1%)               | 0 (0.0%)            | 0 (0.0%)            | 6 (0.1%)          |
| <i>Acinetobacter baumannii</i> complex                         | 15 (0.2%)              | 0 (0.0%)            | 0 (0.0%)            | 15 (0.2%)         |
| <i>Acinetobacter baumannii/nosocomialis</i> group              | 2 (0.0%)               | 0 (0.0%)            | 0 (0.0%)            | 2 (0.0%)          |
| <i>Acinetobacter junii</i>                                     | 3 (0.0%)               | 0 (0.0%)            | 0 (0.0%)            | 3 (0.0%)          |
| <i>Acinetobacter pittii</i>                                    | 2 (0.0%)               | 0 (0.0%)            | 0 (0.0%)            | 2 (0.0%)          |
| <i>Acinetobacter radioresistens</i>                            | 1 (0.0%)               | 0 (0.0%)            | 0 (0.0%)            | 1 (0.0%)          |
| <i>Acinetobacter species</i>                                   | 1 (0.0%)               | 0 (0.0%)            | 0 (0.0%)            | 1 (0.0%)          |
| <i>Acinetobacter ursingii</i>                                  | 5 (0.1%)               | 0 (0.0%)            | 0 (0.0%)            | 5 (0.1%)          |
| <i>Actinobaculum schaalii</i>                                  | 1 (0.0%)               | 0 (0.0%)            | 0 (0.0%)            | 1 (0.0%)          |
| <i>Actinomyces meyeri</i>                                      | 1 (0.0%)               | 0 (0.0%)            | 0 (0.0%)            | 1 (0.0%)          |
| <i>Actinomyces neuii</i>                                       | 1 (0.0%)               | 0 (0.0%)            | 0 (0.0%)            | 1 (0.0%)          |
| <i>Actinomyces odontolyticus</i>                               | 6 (0.1%)               | 0 (0.0%)            | 0 (0.0%)            | 6 (0.1%)          |
| <i>Actinomyces oris</i>                                        | 3 (0.0%)               | 0 (0.0%)            | 0 (0.0%)            | 3 (0.0%)          |
| <i>Actinomyces radidentis</i>                                  | 1 (0.0%)               | 0 (0.0%)            | 0 (0.0%)            | 1 (0.0%)          |
| <i>Actinomyces species</i>                                     | 2 (0.0%)               | 0 (0.0%)            | 0 (0.0%)            | 2 (0.0%)          |
| <i>Actinomyces turicensis</i>                                  | 1 (0.0%)               | 0 (0.0%)            | 1 (0.5%)            | 2 (0.0%)          |
| <i>Aerococcus urinae</i>                                       | 1 (0.0%)               | 0 (0.0%)            | 1 (0.5%)            | 2 (0.0%)          |
| <i>Aerococcus viridans</i>                                     | 4 (0.1%)               | 0 (0.0%)            | 0 (0.0%)            | 4 (0.1%)          |
| <i>Alcaligenes species</i>                                     | 1 (0.0%)               | 0 (0.0%)            | 0 (0.0%)            | 1 (0.0%)          |
| <i>Alloiococcus species</i>                                    | 3 (0.0%)               | 0 (0.0%)            | 0 (0.0%)            | 3 (0.0%)          |
| <i>Anaerococcus prevotii</i>                                   | 2 (0.0%)               | 0 (0.0%)            | 0 (0.0%)            | 2 (0.0%)          |
| <i>Anaerococcus vaginalis</i>                                  | 1 (0.0%)               | 0 (0.0%)            | 0 (0.0%)            | 1 (0.0%)          |
| <i>Arcanobacterium haemolyticum</i>                            | 2 (0.0%)               | 0 (0.0%)            | 0 (0.0%)            | 2 (0.0%)          |
| <i>Arthrobacter cummingsii</i>                                 | 1 (0.0%)               | 0 (0.0%)            | 0 (0.0%)            | 1 (0.0%)          |
| <i>Atopobium parvulum</i>                                      | 1 (0.0%)               | 0 (0.0%)            | 0 (0.0%)            | 1 (0.0%)          |
| <i>Bacillus cereus</i>                                         | 9 (0.1%)               | 1 (0.4%)            | 0 (0.0%)            | 10 (0.1%)         |
| <i>Bacillus megaterium</i>                                     | 1 (0.0%)               | 0 (0.0%)            | 0 (0.0%)            | 1 (0.0%)          |
| <i>Bacillus non-anthraxis</i>                                  | 25 (0.4%)              | 0 (0.0%)            | 9 (4.5%)            | 34 (0.5%)         |
| <i>Bacillus species</i>                                        | 28 (0.4%)              | 0 (0.0%)            | 0 (0.0%)            | 28 (0.4%)         |
| <i>Bacteroides fragilis</i>                                    | 39 (0.6%)              | 1 (0.4%)            | 0 (0.0%)            | 40 (0.6%)         |
| <i>Bacteroides nordii</i>                                      | 1 (0.0%)               | 0 (0.0%)            | 0 (0.0%)            | 1 (0.0%)          |
| <i>Bacteroides ovatus</i>                                      | 5 (0.1%)               | 0 (0.0%)            | 0 (0.0%)            | 5 (0.1%)          |
| <i>Bacteroides thetaiotaomicron</i>                            | 9 (0.1%)               | 2 (0.8%)            | 0 (0.0%)            | 11 (0.2%)         |
| <i>Bacteroides uniformis</i>                                   | 1 (0.0%)               | 0 (0.0%)            | 0 (0.0%)            | 1 (0.0%)          |
| <i>Bacteroides vulgatus</i>                                    | 1 (0.0%)               | 2 (0.8%)            | 0 (0.0%)            | 3 (0.0%)          |
| <i>Bifidobacterium longum</i>                                  | 1 (0.0%)               | 0 (0.0%)            | 0 (0.0%)            | 1 (0.0%)          |
| <i>Brevibacterium casei</i>                                    | 1 (0.0%)               | 0 (0.0%)            | 0 (0.0%)            | 1 (0.0%)          |
| <i>Brevibacterium species</i>                                  | 3 (0.0%)               | 0 (0.0%)            | 0 (0.0%)            | 3 (0.0%)          |
| <i>Burkholderia cepacia</i> complex                            | 2 (0.0%)               | 0 (0.0%)            | 0 (0.0%)            | 2 (0.0%)          |
| <i>Burkholderia multivorans</i>                                | 14 (0.2%)              | 0 (0.0%)            | 0 (0.0%)            | 14 (0.2%)         |
| <i>Campylobacter coli</i>                                      | 2 (0.0%)               | 0 (0.0%)            | 0 (0.0%)            | 2 (0.0%)          |
| <i>Campylobacter fetus</i>                                     | 2 (0.0%)               | 0 (0.0%)            | 0 (0.0%)            | 2 (0.0%)          |
| <i>Candida albicans</i>                                        | 75 (1.2%)              | 3 (1.2%)            | 3 (1.5%)            | 81 (1.2%)         |
| <i>Candida auris</i>                                           | 5 (0.1%)               | 0 (0.0%)            | 0 (0.0%)            | 5 (0.1%)          |
| <i>Candida bracarensis</i>                                     | 2 (0.0%)               | 0 (0.0%)            | 0 (0.0%)            | 2 (0.0%)          |

|                                                 | Not tested<br>(N=6260) | Negative<br>(N=245) | Positive<br>(N=201) | Total<br>(N=6706) |
|-------------------------------------------------|------------------------|---------------------|---------------------|-------------------|
| <i>Candida dubliniensis</i>                     | 4 (0.1%)               | 0 (0.0%)            | 0 (0.0%)            | 4 (0.1%)          |
| <i>Candida glabrata</i>                         | 72 (1.2%)              | 5 (2.0%)            | 1 (0.5%)            | 78 (1.2%)         |
| <i>Candida guilliermondii</i>                   | 2 (0.0%)               | 0 (0.0%)            | 0 (0.0%)            | 2 (0.0%)          |
| <i>Candida krusei</i>                           | 2 (0.0%)               | 0 (0.0%)            | 0 (0.0%)            | 2 (0.0%)          |
| <i>Candida lusitanae</i>                        | 8 (0.1%)               | 0 (0.0%)            | 0 (0.0%)            | 8 (0.1%)          |
| <i>Candida magnoliae</i>                        | 1 (0.0%)               | 0 (0.0%)            | 0 (0.0%)            | 1 (0.0%)          |
| <i>Candida orthopsilosis</i>                    | 1 (0.0%)               | 0 (0.0%)            | 0 (0.0%)            | 1 (0.0%)          |
| <i>Candida parapsilosis complex</i>             | 26 (0.4%)              | 0 (0.0%)            | 0 (0.0%)            | 26 (0.4%)         |
| <i>Candida parapsilosis</i>                     | 14 (0.2%)              | 1 (0.4%)            | 0 (0.0%)            | 15 (0.2%)         |
| <i>Candida pararugosa</i>                       | 1 (0.0%)               | 0 (0.0%)            | 0 (0.0%)            | 1 (0.0%)          |
| <i>Candida tropicalis</i>                       | 27 (0.4%)              | 1 (0.4%)            | 0 (0.0%)            | 28 (0.4%)         |
| <i>Capnocytophaga sputigena</i>                 | 1 (0.0%)               | 0 (0.0%)            | 0 (0.0%)            | 1 (0.0%)          |
| <i>Cellulomonas species</i>                     | 1 (0.0%)               | 0 (0.0%)            | 0 (0.0%)            | 1 (0.0%)          |
| <i>Citrobacter amalonaticus</i>                 | 3 (0.0%)               | 0 (0.0%)            | 0 (0.0%)            | 3 (0.0%)          |
| <i>Citrobacter braakii</i>                      | 2 (0.0%)               | 0 (0.0%)            | 0 (0.0%)            | 2 (0.0%)          |
| <i>Citrobacter freundii</i>                     | 2 (0.0%)               | 0 (0.0%)            | 0 (0.0%)            | 2 (0.0%)          |
| <i>Citrobacter freundii complex</i>             | 6 (0.1%)               | 0 (0.0%)            | 0 (0.0%)            | 6 (0.1%)          |
| <i>Citrobacter koseri</i>                       | 6 (0.1%)               | 2 (0.8%)            | 0 (0.0%)            | 8 (0.1%)          |
| <i>Clostridium baratii</i>                      | 1 (0.0%)               | 0 (0.0%)            | 0 (0.0%)            | 1 (0.0%)          |
| <i>Clostridium bifermentans</i>                 | 1 (0.0%)               | 0 (0.0%)            | 0 (0.0%)            | 1 (0.0%)          |
| <i>Clostridium butyricum</i>                    | 1 (0.0%)               | 0 (0.0%)            | 0 (0.0%)            | 1 (0.0%)          |
| <i>Clostridium cadaveris</i>                    | 1 (0.0%)               | 0 (0.0%)            | 0 (0.0%)            | 1 (0.0%)          |
| <i>Clostridium clostridioforme</i>              | 7 (0.1%)               | 0 (0.0%)            | 0 (0.0%)            | 7 (0.1%)          |
| <i>Clostridium innocuum</i>                     | 1 (0.0%)               | 0 (0.0%)            | 0 (0.0%)            | 1 (0.0%)          |
| <i>Clostridium limosum</i>                      | 2 (0.0%)               | 0 (0.0%)            | 0 (0.0%)            | 2 (0.0%)          |
| <i>Clostridium perfringens</i>                  | 5 (0.1%)               | 0 (0.0%)            | 0 (0.0%)            | 5 (0.1%)          |
| <i>Clostridium ramosum</i>                      | 1 (0.0%)               | 0 (0.0%)            | 0 (0.0%)            | 1 (0.0%)          |
| <i>Clostridium septicum</i>                     | 4 (0.1%)               | 0 (0.0%)            | 0 (0.0%)            | 4 (0.1%)          |
| <i>Clostridium species</i>                      | 1 (0.0%)               | 0 (0.0%)            | 0 (0.0%)            | 1 (0.0%)          |
| <i>Comamonas kerstersii</i>                     | 2 (0.0%)               | 0 (0.0%)            | 0 (0.0%)            | 2 (0.0%)          |
| <i>Comamonas testosteroni</i>                   | 0 (0.0%)               | 0 (0.0%)            | 1 (0.5%)            | 1 (0.0%)          |
| <i>Corynebacterium afermentans</i>              | 8 (0.1%)               | 0 (0.0%)            | 0 (0.0%)            | 8 (0.1%)          |
| <i>Corynebacterium amycolatum</i>               | 6 (0.1%)               | 0 (0.0%)            | 0 (0.0%)            | 6 (0.1%)          |
| <i>Corynebacterium aurimucosum</i>              | 6 (0.1%)               | 0 (0.0%)            | 0 (0.0%)            | 6 (0.1%)          |
| <i>Corynebacterium confusum</i>                 | 2 (0.0%)               | 0 (0.0%)            | 0 (0.0%)            | 2 (0.0%)          |
| <i>Corynebacterium coyleae</i>                  | 5 (0.1%)               | 0 (0.0%)            | 0 (0.0%)            | 5 (0.1%)          |
| <i>Corynebacterium jeikeium</i>                 | 1 (0.0%)               | 0 (0.0%)            | 0 (0.0%)            | 1 (0.0%)          |
| <i>Corynebacterium matruchotii</i>              | 2 (0.0%)               | 0 (0.0%)            | 0 (0.0%)            | 2 (0.0%)          |
| <i>Corynebacterium minutissimum</i>             | 3 (0.0%)               | 0 (0.0%)            | 0 (0.0%)            | 3 (0.0%)          |
| <i>Corynebacterium propinquum</i>               | 1 (0.0%)               | 0 (0.0%)            | 0 (0.0%)            | 1 (0.0%)          |
| <i>Corynebacterium pseudodiphtheriticum</i>     | 1 (0.0%)               | 0 (0.0%)            | 0 (0.0%)            | 1 (0.0%)          |
| <i>Corynebacterium striatum</i>                 | 7 (0.1%)               | 4 (1.6%)            | 0 (0.0%)            | 11 (0.2%)         |
| <i>Corynebacterium tuberculostearicum</i>       | 1 (0.0%)               | 0 (0.0%)            | 0 (0.0%)            | 1 (0.0%)          |
| <i>Corynebacterium tuscaniense</i>              | 1 (0.0%)               | 0 (0.0%)            | 0 (0.0%)            | 1 (0.0%)          |
| <i>Corynebacterium xerosis</i>                  | 1 (0.0%)               | 0 (0.0%)            | 0 (0.0%)            | 1 (0.0%)          |
| <i>Corynebacterium</i>                          | 89 (1.4%)              | 3 (1.2%)            | 5 (2.5%)            | 97 (1.4%)         |
| <i>Corynebacterium species, not C. jeikeium</i> | 1 (0.0%)               | 0 (0.0%)            | 0 (0.0%)            | 1 (0.0%)          |
| <i>Cutibacterium (Propionibacterium) acnes</i>  | 51 (0.8%)              | 4 (1.6%)            | 0 (0.0%)            | 55 (0.8%)         |
| <i>Dermabacter hominis</i>                      | 12 (0.2%)              | 0 (0.0%)            | 0 (0.0%)            | 12 (0.2%)         |
| <i>Desulfovibrio species</i>                    | 1 (0.0%)               | 0 (0.0%)            | 0 (0.0%)            | 1 (0.0%)          |
| <i>Dialister pneumosintes</i>                   | 1 (0.0%)               | 0 (0.0%)            | 0 (0.0%)            | 1 (0.0%)          |

|                                                                        | Not tested<br>(N=6260) | Negative<br>(N=245) | Positive<br>(N=201) | Total<br>(N=6706) |
|------------------------------------------------------------------------|------------------------|---------------------|---------------------|-------------------|
| <i>Dolosigranulum pigrum</i>                                           | 1 (0.0%)               | 0 (0.0%)            | 1 (0.5%)            | 2 (0.0%)          |
| <i>Dolosigranulum species</i>                                          | 1 (0.0%)               | 0 (0.0%)            | 0 (0.0%)            | 1 (0.0%)          |
| <i>Eggerthella lenta</i>                                               | 3 (0.0%)               | 1 (0.4%)            | 0 (0.0%)            | 4 (0.1%)          |
| <i>Eikenella corrodens</i>                                             | 1 (0.0%)               | 0 (0.0%)            | 0 (0.0%)            | 1 (0.0%)          |
| <i>Eikenella species</i>                                               | 1 (0.0%)               | 0 (0.0%)            | 0 (0.0%)            | 1 (0.0%)          |
| <i>Elizabethkingia meningoseptica</i>                                  | 4 (0.1%)               | 0 (0.0%)            | 0 (0.0%)            | 4 (0.1%)          |
| <i>Enterobacter</i>                                                    | 16 (0.3%)              | 1 (0.4%)            | 1 (0.5%)            | 18 (0.3%)         |
| <i>Enterobacter cloacae ssp. cloacae</i>                               | 13 (0.2%)              | 0 (0.0%)            | 0 (0.0%)            | 13 (0.2%)         |
| <i>Enterobacter cloacae</i>                                            | 2 (0.0%)               | 0 (0.0%)            | 0 (0.0%)            | 2 (0.0%)          |
| <i>Enterobacter cloacae</i> complex                                    | 79 (1.3%)              | 0 (0.0%)            | 5 (2.5%)            | 84 (1.3%)         |
| <i>Enterobacter cloacae</i> complex(absence of KPC<br>resistance gene) | 6 (0.1%)               | 0 (0.0%)            | 0 (0.0%)            | 6 (0.1%)          |
| <i>Enterococcus avium</i>                                              | 3 (0.0%)               | 0 (0.0%)            | 0 (0.0%)            | 3 (0.0%)          |
| <i>Enterococcus casseliflavus</i>                                      | 2 (0.0%)               | 0 (0.0%)            | 0 (0.0%)            | 2 (0.0%)          |
| <i>Enterococcus faecalis</i>                                           | 232 (3.7%)             | 4 (1.6%)            | 2 (1.0%)            | 238<br>(3.5%)     |
| <i>Enterococcus faecalis</i> , Vancomycin-Resistant                    | 13 (0.2%)              | 0 (0.0%)            | 0 (0.0%)            | 13 (0.2%)         |
| <i>Enterococcus faecalis</i> , Vancomycin-Susceptible                  | 22 (0.4%)              | 0 (0.0%)            | 0 (0.0%)            | 22 (0.3%)         |
| <i>Enterococcus faecium</i>                                            | 38 (0.6%)              | 3 (1.2%)            | 0 (0.0%)            | 41 (0.6%)         |
| <i>Enterococcus faecium</i> , Vancomycin-Resistant                     | 101 (1.6%)             | 11 (4.5%)           | 1 (0.5%)            | 113<br>(1.7%)     |
| <i>Enterococcus faecium</i> , Vancomycin-Susceptible                   | 5 (0.1%)               | 0 (0.0%)            | 0 (0.0%)            | 5 (0.1%)          |
| <i>Enterococcus gallinarum</i>                                         | 17 (0.3%)              | 1 (0.4%)            | 0 (0.0%)            | 18 (0.3%)         |
| <i>Enterococcus hirae</i>                                              | 1 (0.0%)               | 0 (0.0%)            | 0 (0.0%)            | 1 (0.0%)          |
| <i>Enterococcus italicus</i>                                           | 1 (0.0%)               | 0 (0.0%)            | 0 (0.0%)            | 1 (0.0%)          |
| <i>Enterococcus raffinosus</i>                                         | 3 (0.0%)               | 0 (0.0%)            | 0 (0.0%)            | 3 (0.0%)          |
| <i>Enterococcus species</i>                                            | 1 (0.0%)               | 0 (0.0%)            | 0 (0.0%)            | 1 (0.0%)          |
| <i>Escherichia coli</i>                                                | 721 (11.5%)            | 25 (10.2%)          | 8 (4.0%)            | 754<br>(11.2%)    |
| <i>Escherichia coli</i> - ESBL producer                                | 30 (0.5%)              | 0 (0.0%)            | 0 (0.0%)            | 30 (0.4%)         |
| <i>Escherichia coli</i> (absence of KPC resistance<br>gene)            | 123 (2.0%)             | 4 (1.6%)            | 2 (1.0%)            | 129<br>(1.9%)     |
| <i>Facklamia hominis</i>                                               | 5 (0.1%)               | 0 (0.0%)            | 0 (0.0%)            | 5 (0.1%)          |
| <i>Finegoldia magna</i>                                                | 13 (0.2%)              | 0 (0.0%)            | 0 (0.0%)            | 13 (0.2%)         |
| <i>Flavonifractor plautii</i>                                          | 1 (0.0%)               | 0 (0.0%)            | 0 (0.0%)            | 1 (0.0%)          |
| <i>Fusobacterium mortiferum</i>                                        | 1 (0.0%)               | 0 (0.0%)            | 0 (0.0%)            | 1 (0.0%)          |
| <i>Fusobacterium nucleatum</i>                                         | 9 (0.1%)               | 0 (0.0%)            | 0 (0.0%)            | 9 (0.1%)          |
| <i>Fusobacterium species</i>                                           | 3 (0.0%)               | 0 (0.0%)            | 2 (1.0%)            | 5 (0.1%)          |
| <i>Fusobacterium varium</i>                                            | 1 (0.0%)               | 0 (0.0%)            | 0 (0.0%)            | 1 (0.0%)          |
| <i>Gemella haemolysans</i>                                             | 3 (0.0%)               | 0 (0.0%)            | 0 (0.0%)            | 3 (0.0%)          |
| <i>Gemella morbillorum</i>                                             | 3 (0.0%)               | 0 (0.0%)            | 0 (0.0%)            | 3 (0.0%)          |
| <i>Geotrichum capitatum</i>                                            | 7 (0.1%)               | 0 (0.0%)            | 0 (0.0%)            | 7 (0.1%)          |
| <i>Globicatella sanguinis</i>                                          | 1 (0.0%)               | 0 (0.0%)            | 1 (0.5%)            | 2 (0.0%)          |
| <i>Gordonia aichiensis</i>                                             | 1 (0.0%)               | 0 (0.0%)            | 0 (0.0%)            | 1 (0.0%)          |
| <i>Granulicatella adiacens</i>                                         | 11 (0.2%)              | 0 (0.0%)            | 1 (0.5%)            | 12 (0.2%)         |
| <i>Haemophilus influenzae</i>                                          | 24 (0.4%)              | 2 (0.8%)            | 0 (0.0%)            | 26 (0.4%)         |
| <i>Haemophilus parainfluenzae</i>                                      | 8 (0.1%)               | 0 (0.0%)            | 0 (0.0%)            | 8 (0.1%)          |
| <i>Halomonas species</i>                                               | 1 (0.0%)               | 0 (0.0%)            | 0 (0.0%)            | 1 (0.0%)          |
| <i>Helcococcus succiensis</i>                                          | 1 (0.0%)               | 0 (0.0%)            | 0 (0.0%)            | 1 (0.0%)          |
| <i>Klebsiella aerogenes</i>                                            | 28 (0.4%)              | 0 (0.0%)            | 0 (0.0%)            | 28 (0.4%)         |
| <i>Klebsiella oxytoca</i>                                              | 21 (0.3%)              | 0 (0.0%)            | 0 (0.0%)            | 21 (0.3%)         |

|                                                               | Not tested<br>(N=6260) | Negative<br>(N=245) | Positive<br>(N=201) | Total<br>(N=6706) |
|---------------------------------------------------------------|------------------------|---------------------|---------------------|-------------------|
| <i>Klebsiella oxytoca</i> , absence of KPC resistance gene    | 2 (0.0%)               | 0 (0.0%)            | 0 (0.0%)            | 2 (0.0%)          |
| <i>Klebsiella pneumoniae</i>                                  | 221 (3.5%)             | 14 (5.7%)           | 6 (3.0%)            | 241 (3.6%)        |
| <i>Klebsiella pneumoniae</i> complex                          | 15 (0.2%)              | 0 (0.0%)            | 0 (0.0%)            | 15 (0.2%)         |
| <i>Klebsiella pneumoniae</i> subsp <i>pneumoniae</i>          | 71 (1.1%)              | 2 (0.8%)            | 0 (0.0%)            | 73 (1.1%)         |
| <i>Klebsiella pneumoniae</i> , ESBL producer                  | 4 (0.1%)               | 1 (0.4%)            | 0 (0.0%)            | 5 (0.1%)          |
| <i>Klebsiella pneumoniae</i> , absence of KPC resistance gene | 46 (0.7%)              | 2 (0.8%)            | 0 (0.0%)            | 48 (0.7%)         |
| <i>Klebsiella pneumoniae</i> , Carbapenem resistant           | 1 (0.0%)               | 0 (0.0%)            | 0 (0.0%)            | 1 (0.0%)          |
| <i>Klebsiella pneumoniae</i> , Carbapenem resistant           | 6 (0.1%)               | 0 (0.0%)            | 0 (0.0%)            | 6 (0.1%)          |
| <i>Klebsiella variicola</i>                                   | 7 (0.1%)               | 0 (0.0%)            | 0 (0.0%)            | 7 (0.1%)          |
| <i>Kluyvera cryocrescens</i>                                  | 1 (0.0%)               | 0 (0.0%)            | 0 (0.0%)            | 1 (0.0%)          |
| <i>Kluyvera species</i>                                       | 3 (0.0%)               | 0 (0.0%)            | 0 (0.0%)            | 3 (0.0%)          |
| <i>Kocuria kristinae</i>                                      | 2 (0.0%)               | 0 (0.0%)            | 0 (0.0%)            | 2 (0.0%)          |
| <i>Kocuria marina</i>                                         | 0 (0.0%)               | 0 (0.0%)            | 1 (0.5%)            | 1 (0.0%)          |
| <i>Kocuria rhizophila</i>                                     | 1 (0.0%)               | 0 (0.0%)            | 0 (0.0%)            | 1 (0.0%)          |
| <i>Kocuria species</i>                                        | 2 (0.0%)               | 0 (0.0%)            | 0 (0.0%)            | 2 (0.0%)          |
| <i>Kocuria varians</i>                                        | 2 (0.0%)               | 0 (0.0%)            | 0 (0.0%)            | 2 (0.0%)          |
| <i>Lactobacillus delbruekii</i>                               | 2 (0.0%)               | 0 (0.0%)            | 0 (0.0%)            | 2 (0.0%)          |
| <i>Lactobacillus fermentum</i>                                | 5 (0.1%)               | 0 (0.0%)            | 0 (0.0%)            | 5 (0.1%)          |
| <i>Lactobacillus gasseri</i>                                  | 2 (0.0%)               | 0 (0.0%)            | 0 (0.0%)            | 2 (0.0%)          |
| <i>Lactobacillus paracasei</i>                                | 2 (0.0%)               | 0 (0.0%)            | 0 (0.0%)            | 2 (0.0%)          |
| <i>Lactobacillus rhamnosus</i>                                | 4 (0.1%)               | 0 (0.0%)            | 0 (0.0%)            | 4 (0.1%)          |
| <i>Lactobacillus salivarius</i>                               | 1 (0.0%)               | 0 (0.0%)            | 0 (0.0%)            | 1 (0.0%)          |
| <i>Lactobacillus</i>                                          | 6 (0.1%)               | 0 (0.0%)            | 2 (1.0%)            | 8 (0.1%)          |
| <i>Lactococcus lactis</i>                                     | 1 (0.0%)               | 0 (0.0%)            | 0 (0.0%)            | 1 (0.0%)          |
| <i>Leifsonia aquatica</i>                                     | 1 (0.0%)               | 0 (0.0%)            | 0 (0.0%)            | 1 (0.0%)          |
| <i>Leptotrichia trevisanii</i>                                | 0 (0.0%)               | 1 (0.4%)            | 0 (0.0%)            | 1 (0.0%)          |
| <i>Leuconostoc lactis</i>                                     | 1 (0.0%)               | 0 (0.0%)            | 0 (0.0%)            | 1 (0.0%)          |
| <i>Listeria monocytogenes</i>                                 | 1 (0.0%)               | 0 (0.0%)            | 0 (0.0%)            | 1 (0.0%)          |
| <i>Lodderomyces elongisporus</i>                              | 2 (0.0%)               | 0 (0.0%)            | 0 (0.0%)            | 2 (0.0%)          |
| <i>Meyerozyma species</i>                                     | 4 (0.1%)               | 0 (0.0%)            | 0 (0.0%)            | 4 (0.1%)          |
| <i>Microbacterium lacticum</i>                                | 1 (0.0%)               | 0 (0.0%)            | 0 (0.0%)            | 1 (0.0%)          |
| <i>Microbacterium paraoxydans</i>                             | 1 (0.0%)               | 0 (0.0%)            | 0 (0.0%)            | 1 (0.0%)          |
| <i>Microbacterium testaceum</i>                               | 1 (0.0%)               | 0 (0.0%)            | 0 (0.0%)            | 1 (0.0%)          |
| <i>Microbacterium species</i>                                 | 1 (0.0%)               | 0 (0.0%)            | 0 (0.0%)            | 1 (0.0%)          |
| <i>Micrococcus luteus</i>                                     | 36 (0.6%)              | 2 (0.8%)            | 5 (2.5%)            | 43 (0.6%)         |
| <i>Micrococcus species</i>                                    | 6 (0.1%)               | 0 (0.0%)            | 0 (0.0%)            | 6 (0.1%)          |
| <i>Mogibacterium species</i>                                  | 1 (0.0%)               | 0 (0.0%)            | 0 (0.0%)            | 1 (0.0%)          |
| <i>Moraxella catarrhalis</i>                                  | 2 (0.0%)               | 0 (0.0%)            | 0 (0.0%)            | 2 (0.0%)          |
| <i>Moraxella nonliquefaciens</i>                              | 1 (0.0%)               | 1 (0.4%)            | 0 (0.0%)            | 2 (0.0%)          |
| <i>Moraxella osloensis</i>                                    | 4 (0.1%)               | 0 (0.0%)            | 1 (0.5%)            | 5 (0.1%)          |
| <i>Moraxella species</i>                                      | 1 (0.0%)               | 0 (0.0%)            | 0 (0.0%)            | 1 (0.0%)          |
| <i>Morganella morganii</i>                                    | 16 (0.3%)              | 0 (0.0%)            | 0 (0.0%)            | 16 (0.2%)         |
| <i>Neisseria flavescens</i>                                   | 3 (0.0%)               | 0 (0.0%)            | 0 (0.0%)            | 3 (0.0%)          |
| <i>Neisseria sicca</i>                                        | 2 (0.0%)               | 0 (0.0%)            | 0 (0.0%)            | 2 (0.0%)          |
| <i>Neisseria subflava</i>                                     | 1 (0.0%)               | 0 (0.0%)            | 0 (0.0%)            | 1 (0.0%)          |
| <i>Paenibacillus species</i>                                  | 1 (0.0%)               | 0 (0.0%)            | 0 (0.0%)            | 1 (0.0%)          |
| <i>Paenibacillus urinalis</i>                                 | 1 (0.0%)               | 0 (0.0%)            | 0 (0.0%)            | 1 (0.0%)          |
| <i>Pantoea agglomerans</i> group                              | 3 (0.0%)               | 0 (0.0%)            | 0 (0.0%)            | 3 (0.0%)          |

|                                         | Not tested<br>(N=6260) | Negative<br>(N=245) | Positive<br>(N=201) | Total<br>(N=6706) |
|-----------------------------------------|------------------------|---------------------|---------------------|-------------------|
| <i>Pantoea dispersa</i>                 | 2 (0.0%)               | 0 (0.0%)            | 0 (0.0%)            | 2 (0.0%)          |
| <i>Pantoea septica</i>                  | 2 (0.0%)               | 0 (0.0%)            | 0 (0.0%)            | 2 (0.0%)          |
| <i>Pantoea species</i>                  | 2 (0.0%)               | 0 (0.0%)            | 0 (0.0%)            | 2 (0.0%)          |
| <i>Parabacteroides distasonis</i>       | 3 (0.0%)               | 0 (0.0%)            | 0 (0.0%)            | 3 (0.0%)          |
| <i>Parvimonas micra</i>                 | 6 (0.1%)               | 0 (0.0%)            | 0 (0.0%)            | 6 (0.1%)          |
| <i>Pediococcus pentosaceus</i>          | 3 (0.0%)               | 0 (0.0%)            | 0 (0.0%)            | 3 (0.0%)          |
| <i>Peptoniphilus asaccharolyticus</i>   | 5 (0.1%)               | 0 (0.0%)            | 0 (0.0%)            | 5 (0.1%)          |
| <i>Peptoniphilus harei</i>              | 2 (0.0%)               | 0 (0.0%)            | 0 (0.0%)            | 2 (0.0%)          |
| <i>Peptostreptococcus anaerobius</i>    | 2 (0.0%)               | 0 (0.0%)            | 0 (0.0%)            | 2 (0.0%)          |
| <i>Prevotella bivia</i>                 | 1 (0.0%)               | 0 (0.0%)            | 0 (0.0%)            | 1 (0.0%)          |
| <i>Prevotella buccae</i>                | 1 (0.0%)               | 0 (0.0%)            | 0 (0.0%)            | 1 (0.0%)          |
| <i>Prevotella denticola</i>             | 3 (0.0%)               | 0 (0.0%)            | 0 (0.0%)            | 3 (0.0%)          |
| <i>Prevotella melaninogenica</i>        | 3 (0.0%)               | 0 (0.0%)            | 0 (0.0%)            | 3 (0.0%)          |
| <i>Prevotella nigrescens</i>            | 1 (0.0%)               | 0 (0.0%)            | 0 (0.0%)            | 1 (0.0%)          |
| <i>Prevotella species</i>               | 1 (0.0%)               | 0 (0.0%)            | 0 (0.0%)            | 1 (0.0%)          |
| <i>Propionibacterium avidum</i>         | 2 (0.0%)               | 0 (0.0%)            | 1 (0.5%)            | 3 (0.0%)          |
| <i>Propionibacterium granulosum</i>     | 1 (0.0%)               | 0 (0.0%)            | 0 (0.0%)            | 1 (0.0%)          |
| <i>Propionibacterium species</i>        | 2 (0.0%)               | 0 (0.0%)            | 0 (0.0%)            | 2 (0.0%)          |
| <i>Proteus mirabilis</i>                | 102 (1.6%)             | 4 (1.6%)            | 0 (0.0%)            | 106<br>(1.6%)     |
| <i>Proteus penneri</i>                  | 1 (0.0%)               | 0 (0.0%)            | 0 (0.0%)            | 1 (0.0%)          |
| <i>Proteus vulgaris</i> group           | 1 (0.0%)               | 0 (0.0%)            | 0 (0.0%)            | 1 (0.0%)          |
| <i>Proteus</i>                          | 6 (0.1%)               | 1 (0.4%)            | 0 (0.0%)            | 7 (0.1%)          |
| <i>Providencia rettgeri</i>             | 6 (0.1%)               | 0 (0.0%)            | 0 (0.0%)            | 6 (0.1%)          |
| <i>Providencia stuartii</i>             | 6 (0.1%)               | 0 (0.0%)            | 0 (0.0%)            | 6 (0.1%)          |
| <i>Pseudomonas aeruginosa</i>           | 147 (2.3%)             | 14 (5.7%)           | 0 (0.0%)            | 161<br>(2.4%)     |
| <i>Pseudomonas aeruginosa</i> , mucoid* | 6 (0.1%)               | 0 (0.0%)            | 0 (0.0%)            | 6 (0.1%)          |
| <i>Pseudomonas putida</i>               | 1 (0.0%)               | 0 (0.0%)            | 0 (0.0%)            | 1 (0.0%)          |
| <i>Pseudomonas stutzeri</i>             | 0 (0.0%)               | 2 (0.8%)            | 0 (0.0%)            | 2 (0.0%)          |
| <i>Psychrobacter species</i>            | 1 (0.0%)               | 0 (0.0%)            | 0 (0.0%)            | 1 (0.0%)          |
| <i>Rhodococcus species</i>              | 1 (0.0%)               | 0 (0.0%)            | 0 (0.0%)            | 1 (0.0%)          |
| <i>Rhodotorula mucilaginosa</i>         | 7 (0.1%)               | 0 (0.0%)            | 0 (0.0%)            | 7 (0.1%)          |
| <i>Roseomonas mucosa</i>                | 1 (0.0%)               | 0 (0.0%)            | 0 (0.0%)            | 1 (0.0%)          |
| <i>Roseomonas species</i>               | 1 (0.0%)               | 0 (0.0%)            | 0 (0.0%)            | 1 (0.0%)          |
| <i>Rothia aeria</i>                     | 0 (0.0%)               | 0 (0.0%)            | 1 (0.5%)            | 1 (0.0%)          |
| <i>Rothia dentocariosa</i>              | 2 (0.0%)               | 0 (0.0%)            | 0 (0.0%)            | 2 (0.0%)          |
| <i>Rothia mucilaginosa</i>              | 8 (0.1%)               | 0 (0.0%)            | 0 (0.0%)            | 8 (0.1%)          |
| <i>Ruminococcus gnavus</i>              | 6 (0.1%)               | 0 (0.0%)            | 0 (0.0%)            | 6 (0.1%)          |
| <i>Salmonella enterica</i>              | 1 (0.0%)               | 0 (0.0%)            | 0 (0.0%)            | 1 (0.0%)          |
| <i>Salmonella typhi</i>                 | 9 (0.1%)               | 0 (0.0%)            | 0 (0.0%)            | 9 (0.1%)          |
| <i>Salmonella</i>                       | 13 (0.2%)              | 0 (0.0%)            | 2 (1.0%)            | 15 (0.2%)         |
| <i>Salmonella</i> serotype Paratyphi A  | 2 (0.0%)               | 0 (0.0%)            | 0 (0.0%)            | 2 (0.0%)          |
| <i>Salmonella</i> serotype Typhi        | 4 (0.1%)               | 0 (0.0%)            | 0 (0.0%)            | 4 (0.1%)          |
| <i>Serratia liquefaciens</i>            | 4 (0.1%)               | 0 (0.0%)            | 0 (0.0%)            | 4 (0.1%)          |
| <i>Serratia liquefaciens</i> complex    | 1 (0.0%)               | 0 (0.0%)            | 0 (0.0%)            | 1 (0.0%)          |
| <i>Serratia marcescens</i>              | 57 (0.9%)              | 1 (0.4%)            | 0 (0.0%)            | 58 (0.9%)         |
| <i>Sphingomonas paucimobilis</i>        | 2 (0.0%)               | 0 (0.0%)            | 0 (0.0%)            | 2 (0.0%)          |
| <i>Sphingomonas species</i>             | 1 (0.0%)               | 0 (0.0%)            | 0 (0.0%)            | 1 (0.0%)          |
| <i>Staphylococcus aureus</i>            | 105 (1.7%)             | 4 (1.6%)            | 1 (0.5%)            | 110<br>(1.6%)     |

|                                                                        | Not tested<br>(N=6260) | Negative<br>(N=245) | Positive<br>(N=201) | Total<br>(N=6706) |
|------------------------------------------------------------------------|------------------------|---------------------|---------------------|-------------------|
| <i>Staphylococcus aureus</i> , Methicillin Resistant                   | 352 (5.6%)             | 9 (3.7%)            | 4 (2.0%)            | 365<br>(5.4%)     |
| <i>Staphylococcus aureus</i> , Methicillin Susceptible                 | 548 (8.8%)             | 21 (8.6%)           | 6 (3.0%)            | 575<br>(8.6%)     |
| <i>Staphylococcus auricularis</i>                                      | 9 (0.1%)               | 0 (0.0%)            | 1 (0.5%)            | 10 (0.1%)         |
| <i>Staphylococcus capitis</i>                                          | 139 (2.2%)             | 7 (2.9%)            | 11 (5.5%)           | 157<br>(2.3%)     |
| <i>Staphylococcus caprae</i>                                           | 5 (0.1%)               | 0 (0.0%)            | 0 (0.0%)            | 5 (0.1%)          |
| <i>Staphylococcus cohnii</i>                                           | 6 (0.1%)               | 0 (0.0%)            | 0 (0.0%)            | 6 (0.1%)          |
| <i>Staphylococcus epidermidis</i>                                      | 633 (10.1%)            | 24 (9.8%)           | 39 (19.4%)          | 696<br>(10.4%)    |
| <i>Staphylococcus epidermidis</i> , Methicillin<br>Susceptible         | 15 (0.2%)              | 0 (0.0%)            | 0 (0.0%)            | 15 (0.2%)         |
| <i>Staphylococcus epidermidis</i> ,Methicillin<br>Resistant            | 24 (0.4%)              | 0 (0.0%)            | 0 (0.0%)            | 24 (0.4%)         |
| <i>Staphylococcus equorum</i>                                          | 2 (0.0%)               | 0 (0.0%)            | 0 (0.0%)            | 2 (0.0%)          |
| <i>Staphylococcus haemolyticus</i>                                     | 59 (0.9%)              | 1 (0.4%)            | 8 (4.0%)            | 68 (1.0%)         |
| <i>Staphylococcus hominis</i>                                          | 209 (3.3%)             | 7 (2.9%)            | 28 (13.9%)          | 244<br>(3.6%)     |
| <i>Staphylococcus lugdunensis</i>                                      | 22 (0.4%)              | 0 (0.0%)            | 1 (0.5%)            | 23 (0.3%)         |
| <i>Staphylococcus pasteurii</i>                                        | 1 (0.0%)               | 1 (0.4%)            | 0 (0.0%)            | 2 (0.0%)          |
| <i>Staphylococcus pettenkoferi</i>                                     | 33 (0.5%)              | 1 (0.4%)            | 0 (0.0%)            | 34 (0.5%)         |
| <i>Staphylococcus pseudintermedius</i>                                 | 3 (0.0%)               | 2 (0.8%)            | 0 (0.0%)            | 5 (0.1%)          |
| <i>Staphylococcus saccharolyticus</i>                                  | 6 (0.1%)               | 0 (0.0%)            | 0 (0.0%)            | 6 (0.1%)          |
| <i>Staphylococcus saprophyticus</i>                                    | 4 (0.1%)               | 2 (0.8%)            | 0 (0.0%)            | 6 (0.1%)          |
| <i>Staphylococcus simulans</i>                                         | 6 (0.1%)               | 0 (0.0%)            | 0 (0.0%)            | 6 (0.1%)          |
| <i>Staphylococcus species</i>                                          | 3 (0.0%)               | 0 (0.0%)            | 0 (0.0%)            | 3 (0.0%)          |
| <i>Staphylococcus warneri</i>                                          | 12 (0.2%)              | 2 (0.8%)            | 5 (2.5%)            | 19 (0.3%)         |
| <i>Staphylococcus</i> , Coagulase-negative                             | 171 (2.7%)             | 3 (1.2%)            | 8 (4.0%)            | 182<br>(2.7%)     |
| <i>Staphylococcus</i> , Coagulase-negative, Methicillin<br>Resistant   | 41 (0.7%)              | 4 (1.6%)            | 7 (3.5%)            | 52 (0.8%)         |
| <i>Staphylococcus</i> , Coagulase-negative, Methicillin<br>Susceptible | 39 (0.6%)              | 4 (1.6%)            | 10 (5.0%)           | 53 (0.8%)         |
| <i>Stenotrophomonas maltophilia</i>                                    | 19 (0.3%)              | 0 (0.0%)            | 0 (0.0%)            | 19 (0.3%)         |
| <i>Streptococci</i>                                                    | 1 (0.0%)               | 0 (0.0%)            | 0 (0.0%)            | 1 (0.0%)          |
| <i>Streptococci</i> , Viridans Group                                   | 34 (0.5%)              | 2 (0.8%)            | 2 (1.0%)            | 38 (0.6%)         |
| <i>Streptococcus anginosus</i>                                         | 30 (0.5%)              | 4 (1.6%)            | 2 (1.0%)            | 36 (0.5%)         |
| <i>Streptococcus constellatus</i>                                      | 18 (0.3%)              | 0 (0.0%)            | 0 (0.0%)            | 18 (0.3%)         |
| <i>Streptococcus constellatus</i> subsp <i>constellatus</i>            | 7 (0.1%)               | 0 (0.0%)            | 0 (0.0%)            | 7 (0.1%)          |
| <i>Streptococcus cristatus</i>                                         | 10 (0.2%)              | 0 (0.0%)            | 0 (0.0%)            | 10 (0.1%)         |
| <i>Streptococcus dysgalactiae</i> (Group C or G)                       | 9 (0.1%)               | 4 (1.6%)            | 0 (0.0%)            | 13 (0.2%)         |
| <i>Streptococcus dysgalactiae</i> subsp <i>equisimilis</i>             | 8 (0.1%)               | 0 (0.0%)            | 0 (0.0%)            | 8 (0.1%)          |
| <i>Streptococcus gallolyticus</i>                                      | 25 (0.4%)              | 1 (0.4%)            | 0 (0.0%)            | 26 (0.4%)         |
| <i>Streptococcus gordonii</i>                                          | 38 (0.6%)              | 0 (0.0%)            | 0 (0.0%)            | 38 (0.6%)         |
| <i>Streptococcus infantarius</i>                                       | 1 (0.0%)               | 0 (0.0%)            | 0 (0.0%)            | 1 (0.0%)          |
| <i>Streptococcus intermedius</i>                                       | 1 (0.0%)               | 0 (0.0%)            | 1 (0.5%)            | 2 (0.0%)          |
| <i>Streptococcus lutetiensis</i> ( <i>S.bovis</i> )                    | 5 (0.1%)               | 0 (0.0%)            | 0 (0.0%)            | 5 (0.1%)          |
| <i>Streptococcus mitis</i> group                                       | 15 (0.2%)              | 0 (0.0%)            | 0 (0.0%)            | 15 (0.2%)         |
| <i>Streptococcus mitis</i> oralis group                                | 47 (0.8%)              | 0 (0.0%)            | 0 (0.0%)            | 47 (0.7%)         |
| <i>Streptococcus mitis</i>                                             | 25 (0.4%)              | 1 (0.4%)            | 0 (0.0%)            | 26 (0.4%)         |

|                                                | Not tested<br>(N=6260) | Negative<br>(N=245) | Positive<br>(N=201) | Total<br>(N=6706) |
|------------------------------------------------|------------------------|---------------------|---------------------|-------------------|
| <i>Streptococcus mutans</i>                    | 7 (0.1%)               | 0 (0.0%)            | 0 (0.0%)            | 7 (0.1%)          |
| <i>Streptococcus parasanguinis</i>             | 26 (0.4%)              | 1 (0.4%)            | 0 (0.0%)            | 27 (0.4%)         |
| <i>Streptococcus pasteurianus (S.bovis)</i>    | 1 (0.0%)               | 0 (0.0%)            | 0 (0.0%)            | 1 (0.0%)          |
| <i>Streptococcus pneumoniae</i>                | 92 (1.5%)              | 6 (2.4%)            | 0 (0.0%)            | 98 (1.5%)         |
| <i>Streptococcus pseudoporcinus</i>            | 1 (0.0%)               | 0 (0.0%)            | 0 (0.0%)            | 1 (0.0%)          |
| <i>Streptococcus salivarius group</i>          | 4 (0.1%)               | 0 (0.0%)            | 0 (0.0%)            | 4 (0.1%)          |
| <i>Streptococcus salivarius</i>                | 19 (0.3%)              | 1 (0.4%)            | 0 (0.0%)            | 20 (0.3%)         |
| <i>Streptococcus sanguinis</i>                 | 27 (0.4%)              | 0 (0.0%)            | 1 (0.5%)            | 28 (0.4%)         |
| <i>Streptococcus species</i>                   | 88 (1.4%)              | 5 (2.0%)            | 2 (1.0%)            | 95 (1.4%)         |
| <i>Streptococcus</i> , Beta Hemolytic, Group G | 9 (0.1%)               | 0 (0.0%)            | 0 (0.0%)            | 9 (0.1%)          |
| <i>Tsukamurella species</i>                    | 3 (0.0%)               | 0 (0.0%)            | 0 (0.0%)            | 3 (0.0%)          |
| <i>Veillonella parvula</i>                     | 3 (0.0%)               | 0 (0.0%)            | 0 (0.0%)            | 3 (0.0%)          |
| <i>Veillonella species</i>                     | 1 (0.0%)               | 2 (0.8%)            | 0 (0.0%)            | 3 (0.0%)          |
| <i>Weissella confusa</i>                       | 1 (0.0%)               | 0 (0.0%)            | 0 (0.0%)            | 1 (0.0%)          |
| <i>Weissella viridescens</i>                   | 1 (0.0%)               | 0 (0.0%)            | 0 (0.0%)            | 1 (0.0%)          |
| Anaerobic Gram Positive Rod                    | 5 (0.1%)               | 0 (0.0%)            | 0 (0.0%)            | 5 (0.1%)          |
| Yeast                                          | 2 (0.0%)               | 0 (0.0%)            | 0 (0.0%)            | 2 (0.0%)          |
| Yeast, not <i>Candida albicans</i>             | 2 (0.0%)               | 0 (0.0%)            | 0 (0.0%)            | 2 (0.0%)          |

Supplementary Table 4: Proportion of positive cultures identified by gram stain at days 1 to 5 of culture

|                       | Not tested (N=1672) | Negative (N=112) | Positive (N=75) | Total (N=1859) | p value            |
|-----------------------|---------------------|------------------|-----------------|----------------|--------------------|
| <b>Incubation day</b> |                     |                  |                 |                | 0.002 <sup>1</sup> |
| 1                     | 993 (59.4%)         | 65 (58.0%)       | 26 (34.7%)      | 1084 (58.3%)   |                    |
| 2                     | 487 (29.1%)         | 32 (28.6%)       | 37 (49.3%)      | 556 (29.9%)    |                    |
| 3                     | 113 (6.8%)          | 7 (6.2%)         | 10 (13.3%)      | 130 (7.0%)     |                    |
| 4                     | 48 (2.9%)           | 6 (5.4%)         | 1 (1.3%)        | 55 (3.0%)      |                    |
| 5                     | 31 (1.9%)           | 2 (1.8%)         | 1 (1.3%)        | 34 (1.8%)      |                    |

1. Pearson's Chi-squared test

Supplementary Table 5: Organisms identified after 4 days of incubation

| ID    | SARS-CoV-2 Status | Time to Gram stain | Organism Name                                          | Likely Contaminant |
|-------|-------------------|--------------------|--------------------------------------------------------|--------------------|
| 08770 | Not tested        | 5.0 days           | <i>Escherichia coli</i>                                | No                 |
| 10753 | Not tested        | 4.2 days           | <i>Burkholderia multivorans</i>                        | No                 |
| 11446 | Not tested        | 4.2 days           | <i>Candida glabrata</i>                                | No                 |
| 12500 | Not tested        | 4.3 days           | <i>Klebsiella pneumoniae</i>                           | No                 |
| 14732 | Not tested        | 4.4 days           | <i>Escherichia coli</i>                                | No                 |
| 14883 | Not tested        | 4.7 days           | <i>Propionibacterium granulosum</i>                    | No                 |
| 15480 | Not tested        | 4.7 days           | <i>Burkholderia multivorans</i>                        | No                 |
| 15750 | Not tested        | 4.9 days           | <i>Gordonia aichiensis</i>                             | No                 |
| 16262 | Not tested        | 4.1 days           | <i>Klebsiella pneumoniae</i>                           | No                 |
| 16516 | Not tested        | 4.3 days           | <i>Staphylococcus aureus</i> , Methicillin Susceptible | No                 |
| 18586 | Not tested        | 4.4 days           | <i>Fusobacterium nucleatum</i>                         | No                 |
| 18665 | Not tested        | 4.8 days           | <i>Proteus mirabilis</i>                               | No                 |
| 18993 | Not tested        | 4.0 days           | <i>Enterococcus faecalis</i>                           | No                 |
| 19101 | Not tested        | 4.9 days           | <i>Proteus mirabilis</i>                               | No                 |
| 19834 | Not tested        | 4.7 days           | <i>Staphylococcus aureus</i> , Methicillin Susceptible | No                 |
| 20852 | Not tested        | 4.2 days           | <i>Staphylococcus aureus</i> , Methicillin Susceptible | No                 |
| 20900 | Not tested        | 4.5 days           | <i>Candida albicans</i>                                | No                 |
| 21446 | Not tested        | 4.6 days           | <i>Haemophilus parainfluenzae</i>                      | No                 |
| 08825 | Not tested        | 4.4 days           | Anaerobic Gram Positive Rod                            | Yes                |
| 09160 | Not tested        | 4.2 days           | <i>Staphylococcus epidermidis</i>                      | Yes                |
| 09309 | Not tested        | 4.2 days           | <i>Staphylococcus hominis</i>                          | Yes                |
| 09536 | Not tested        | 5.0 days           | <i>Cutibacterium (Propionibacterium) acnes</i>         | Yes                |
| 11928 | Not tested        | 4.4 days           | <i>Cutibacterium (Propionibacterium) acnes</i>         | Yes                |
| 12590 | Not tested        | 4.1 days           | <i>Cutibacterium (Propionibacterium) acnes</i>         | Yes                |
| 13366 | Not tested        | 4.5 days           | <i>Cutibacterium (Propionibacterium) acnes</i>         | Yes                |
| 14694 | Not tested        | 4.6 days           | <i>Corynebacterium afermentans</i>                     | Yes                |
| 15565 | Not tested        | 4.3 days           | <i>Cutibacterium (Propionibacterium) acnes</i>         | Yes                |
| 16048 | Not tested        | 4.8 days           | <i>Staphylococcus pettenkoferi</i>                     | Yes                |
| 17171 | Not tested        | 4.4 days           | <i>Cutibacterium (Propionibacterium) acnes</i>         | Yes                |
| 18105 | Not tested        | 4.5 days           | <i>Cutibacterium (Propionibacterium) acnes</i>         | Yes                |
| 18638 | Not tested        | 4.3 days           | <i>Staphylococcus lugdunensis</i>                      | Yes                |
| 19887 | Not tested        | 4.8 days           | <i>Staphylococcus pettenkoferi</i>                     | Yes                |
| 19887 | Not tested        | 4.8 days           | <i>Corynebacterium</i>                                 | Yes                |
| 22589 | Negative          | 4.1 days           | <i>Proteus mirabilis</i>                               | No                 |
| 23268 | Negative          | 4.7 days           | <i>Candida glabrata</i>                                | No                 |
| 23021 | Positive          | 4.0 days           | <i>Candida albicans</i>                                | No                 |
